# Supplementary material
Source: Research Square preprint supplement (doi:10.21203/rs.3.rs-8934628/v1)
Supplement: Supplementary file 1 [file 31d20c58cccb6c646793c214.pdf]

**Supplementary File 1**

**Structured Questionnaire**

**Title: Factors associated with acceptability of Video Directly Observed Therapy Selfie (VDOT) Method for Tuberculosis Treatment Adherence among Tuberculosis patients in Kampala, Uganda**

Participant ID number  
 .....

|                                      | Questions                             | Responses                                                                                                                                                                                                                                          |
|--------------------------------------|---------------------------------------|----------------------------------------------------------------------------------------------------------------------------------------------------------------------------------------------------------------------------------------------------|
| <b>Section A: Socio-demographics</b> |                                       |                                                                                                                                                                                                                                                    |
| A1                                   | What is your sex?                     | 1. Male<br>2. Female                                                                                                                                                                                                                               |
| A2                                   | What is your age? (in complete years) | ..... years old                                                                                                                                                                                                                                    |
| A3                                   | What is your religion?                | 1. Anglican<br>2. Catholic<br>3. Muslim<br>4. Pentecostal (born again)<br>5. SDA<br>6. Others (Specify).....                                                                                                                                       |
| A4                                   | What is your education level?         | 1. No education<br>2. Primary<br>3. Secondary<br>4. More than Secondary                                                                                                                                                                            |
| A5                                   | What is your occupation?              | 1. Professional/technical/managerial<br>2. Clerical, sales and services<br>3. Skilled agricultural/forestry/fishery<br>4. Craft and trade,<br>5. Plant/machine operator<br>6. Elementary occupations<br>7. None<br>8. Other (Please Specify) ..... |

|     |                                              |                                                                                                                                                                                                                      |
|-----|----------------------------------------------|----------------------------------------------------------------------------------------------------------------------------------------------------------------------------------------------------------------------|
| A6  | What is your marital status?                 | <ol style="list-style-type: none"> <li>1. Never Married</li> <li>2. Married</li> <li>3. Living together</li> <li>4. Divorced/ Separated</li> <li>5. Widowed</li> </ol>                                               |
| A7  | Do you have dependents?                      | <ol style="list-style-type: none"> <li>1. Yes</li> <li>2. No</li> </ol>                                                                                                                                              |
| A7a | If yes to A7, how many dependents?           | .....                                                                                                                                                                                                                |
| A8  | How many Household members do you stay with? | <ol style="list-style-type: none"> <li>1. None</li> <li>2. 1-2</li> <li>3. 3-6</li> <li>4. 7-10</li> <li>5. &gt;10</li> </ol>                                                                                        |
| A9  | What is your monthly household income?       | <ol style="list-style-type: none"> <li>1. &lt;UGX100,000/=</li> <li>2. UGX 100,000 - 300,000/=</li> <li>3. UGX 300,000 -500,000/=</li> <li>4. Ugx 500,000-1M</li> <li>5. UGX 1M 3M</li> <li>6. &gt;UGX 3M</li> </ol> |

**Section B: Acceptability of VDOT**

|    |                                                                                                                     |                                                                                                                                                                                      |
|----|---------------------------------------------------------------------------------------------------------------------|--------------------------------------------------------------------------------------------------------------------------------------------------------------------------------------|
| B1 | To what extent do you agree or disagree that using VDOT Selfie for tuberculosis medication adherence is acceptable? | <ol style="list-style-type: none"> <li>1 - Strongly Disagree</li> <li>2 - Disagree</li> <li>3 - Neither Agree nor Disagree</li> <li>4 - Agree</li> <li>5 - Strongly Agree</li> </ol> |
| B2 | How likely are you to use VDOT Selfie for tuberculosis medication adherence in the future?                          | <ol style="list-style-type: none"> <li>1 - Very Unlikely</li> <li>2 - Unlikely</li> <li>3 - Neutral</li> <li>4 - Likely</li> <li>5 - Very Likely</li> </ol>                          |

|                                                      |                                                                                                                                  |                                                                                                                                      |
|------------------------------------------------------|----------------------------------------------------------------------------------------------------------------------------------|--------------------------------------------------------------------------------------------------------------------------------------|
| B3                                                   | How acceptable do you find the idea of using VDOT Selfie for tuberculosis medication adherence?                                  | 1 - Not at all Acceptable<br>2 - Slightly Acceptable<br>3 - Neutral<br>4 - Acceptable<br>5 - Very Acceptable                         |
| B4                                                   | If given the opportunity, how likely would you be to adopt VDOT Selfie for tuberculosis medication adherence?                    | 1 - Very Unlikely<br>2 - Unlikely<br>3 - Neutral<br>4 - Likely<br>5 - Very Likely                                                    |
| B5                                                   | In a scenario where you were asked to use VDOT Selfie for tuberculosis medication adherence, how willing would you be to try it? | 1 - Very Unwilling<br>2 - Unwilling<br>3 - Neutral<br>4 - Willing<br>5 - Very Willing                                                |
| <b>SECTION B: Attitudes towards adoption of VDOT</b> |                                                                                                                                  |                                                                                                                                      |
| C1                                                   | How positively do you feel about using VDOT Selfie for TB medication adherence?                                                  | 1 - Very Negative<br>2 - Negative<br>3 - Neutral<br>4 - Positive<br>5 - Very Positive                                                |
| C2                                                   | To what extent do you believe using VDOT Selfie for TB medication adherence would benefit you?                                   | 1 - Not at all beneficial<br>2 - Slightly beneficial<br>3 - Moderately beneficial<br>4 - Very beneficial<br>5 - Extremely beneficial |
| C3                                                   | How much would you trust healthcare providers in their recommendation of VDOT Selfie for TB medication adherence?                | 1 - No trust at all<br>2 - Little trust<br>3 - Some trust<br>4 - Much trust<br>5 - Complete trust                                    |
| C4                                                   | How motivated are you personally to use VDOT Selfie for TB medication adherence?                                                 | 1 - Not motivated at all<br>2 - Slightly motivated                                                                                   |

|                                              |                                                                                                               |                                                                                                                                                     |
|----------------------------------------------|---------------------------------------------------------------------------------------------------------------|-----------------------------------------------------------------------------------------------------------------------------------------------------|
|                                              |                                                                                                               | 3 - Moderately motivated<br>4 - Very motivated<br>5 - Extremely motivated                                                                           |
| C5                                           | How much do you feel social stigma would affect your decision to use VDOT Selfie for TB medication adherence? | 1 - Not at all affected<br>2 - Slightly affected<br>3 - Moderately affected<br>4 - Very affected<br>5 - Extremely affected                          |
| <b>SECTION D: Technology related factors</b> |                                                                                                               |                                                                                                                                                     |
| D1                                           | Do you currently have a private mobile smartphone phone?                                                      | 1. Yes<br>2. No                                                                                                                                     |
| D2                                           | If “YES” Does your smartphone have internet access?                                                           | 1. Yes<br>2. No                                                                                                                                     |
| D3                                           | How easy is it to record videos using a mobile smartphone?                                                    | 1. Very easy<br>2. Easy<br>3. Neither easy nor difficult<br>4. Difficult<br>5. Very difficult                                                       |
| <b>Perceived Ease of Use of VDOT</b>         |                                                                                                               |                                                                                                                                                     |
| D4                                           | How user-friendly do you find the interface of VDOT Selfie?                                                   | 1 - Not user-friendly at all<br>2 - Slightly user-friendly<br>3 - Moderately user-friendly<br>4 - Very user-friendly<br>5 - Extremely user-friendly |
| D5                                           | How easy do you think it would be to use VDOT Selfie and integrate it into your daily routine?                | 1 - Not easy at all<br>2 - Slightly easy<br>3 - Moderately easy<br>4 - Very easy<br>5 - Extremely easy                                              |
| D6                                           | How important is the ease of use of VDOT Selfie in your decision to use it?                                   | 1 - Not important at all<br>2 - Slightly important<br>3 - Moderately important                                                                      |

|                                     |                                                                                                                   |                                                                                                                                 |
|-------------------------------------|-------------------------------------------------------------------------------------------------------------------|---------------------------------------------------------------------------------------------------------------------------------|
|                                     |                                                                                                                   | 4 - Very important<br>5 - Extremely important                                                                                   |
| D7                                  | How confident are you in your ability to use VDOT Selfie after receiving training?                                | 1 - Not confident at all<br>2 - Slightly confident<br>3 - Moderately confident<br>4 - Very confident<br>5 - Extremely confident |
| D8                                  | How much do you believe technical support and training would enhance your ability to use VDOT Selfie effectively? | 1 - Not enhance at all<br>2 - Slightly enhance<br>3 - Moderately enhance<br>4 - Very<br>5 - Extremely enhance                   |
| <b>Perceived Usefulness of VDOT</b> |                                                                                                                   |                                                                                                                                 |
| D8                                  | How useful do you believe VDOT Selfie would be in helping you remember to take your medication?                   | 1 - Not useful at all<br>2 - Slightly useful<br>3 - Moderately useful<br>4 - Very useful<br>5 - Extremely useful                |
| D9                                  | To what extent do you think VDOT Selfie would improve your adherence to your medication regimen?                  | 1 - Not improve at all<br>2 - Slightly improve<br>3 - Moderately improve<br>4 - Great<br>5 - Greatly improve                    |
| D10                                 | How likely do you think VDOT Selfie would help you take your medication correctly?                                | 1 - Not likely at all<br>2 - Slightly likely<br>3 - Moderately likely<br>4 - Very likely<br>5 - Extremely likely                |
| D11                                 | How much do you believe VDOT Selfie would assist you in managing your medication schedule?                        | 1 - Not assist at all<br>2 - Slightly assist<br>3 - Moderately assist<br>4 - Very<br>5 - Extremely assist                       |

|                                                   |                                                                                                                                 |                                                                                                                                                                                  |
|---------------------------------------------------|---------------------------------------------------------------------------------------------------------------------------------|----------------------------------------------------------------------------------------------------------------------------------------------------------------------------------|
| D12                                               | How valuable do you think VDOT Selfie would be in helping you stick to your medication routine?                                 | 1 - Not valuable at all<br>2 - Slightly valuable<br>3 - Moderately valuable<br>4 - Very valuable<br>5 - Extremely valuable                                                       |
| <b>SECTION E: Health facility related factors</b> |                                                                                                                                 |                                                                                                                                                                                  |
| E1                                                | What is the distance from your home to this health facility?                                                                    | ..... km                                                                                                                                                                         |
| E2                                                | What would you say about the distance from your home to the health facility?                                                    | 1. Near<br>2. Far                                                                                                                                                                |
| E3                                                | How much do you spend to and fro to the health facility?                                                                        | .....UGX                                                                                                                                                                         |
| E4                                                | What challenges do you face while accessing this health facility?                                                               | 1. Transport is expensive<br>2. Traffic congestion on the road<br>3. Motion sickness while traveling<br>4. I cannot come on my own(disabled)<br>5. Others (Please Specify) ..... |
| <b>Healthcare System Support</b>                  |                                                                                                                                 |                                                                                                                                                                                  |
| E5                                                | How do you rate the potential availability of healthcare providers to assist with integrating VDOT Selfie into TB treatment?    | 1 - Very poor<br>2 - Poor<br>3 - Neutral<br>4 - Good<br>5 - Excellent                                                                                                            |
| E6                                                | Do you feel that there is sufficient availability of healthcare staff and effective coordination of resources for TB treatment? | 1 - Strongly disagree<br>2 - Disagree<br>3 - Neither agree nor disagree<br>4 - Agree<br>5 - Strongly agree                                                                       |
| <b>Privacy and Confidentiality Concerns</b>       |                                                                                                                                 |                                                                                                                                                                                  |

|                                         |                                                                                                                          |                                                                                                                                                                                                                            |
|-----------------------------------------|--------------------------------------------------------------------------------------------------------------------------|----------------------------------------------------------------------------------------------------------------------------------------------------------------------------------------------------------------------------|
| E7                                      | How confident would you be in the privacy and confidentiality of your data when using VDOT Selfie for TB treatment?      | 1 - Not confident at all<br>2 - Slightly confident<br>3 - Moderately confident<br>4 - Very confident<br>5 - Extremely confident                                                                                            |
| E8                                      | To what extent do you feel you would have control over the sharing of your data when using VDOT Selfie?                  | 1 - No control<br>2 - Little control<br>3 - Moderate control<br>4 - High control<br>5 - Very High control                                                                                                                  |
| <b>Previous Experience and Exposure</b> |                                                                                                                          |                                                                                                                                                                                                                            |
| E9                                      | Have you had any previous experience with using digital health technologies for healthcare?                              | 1. Yes<br>2. No                                                                                                                                                                                                            |
| E10                                     | How would you rate your level of awareness regarding the benefits and limitations of using VDOT Selfie for TB treatment? | 1 - Very low awareness<br>2 - Low awareness<br>3 - Moderate awareness<br>4 - High awareness<br>5 - Very high awareness                                                                                                     |
| E11                                     | What challenges do you foresee in using VDOT Selfie for TB medication adherence?                                         | 1. Technical issues with the app<br>2. Concerns about privacy and confidentiality<br>3. Lack of access to a suitable device<br>4. Limited understanding of how to use the technology<br>5. Other (please specify)<br>..... |
